# Supplementary figures and images for: Polysaccharides from Sargassum fusiforme after UV/H2O2 degradation effectively ameliorate dextran sulfate sodium-induced colitis
Source: Royal Society of Chemistry journal article supplement (doi:10.1039/d1fo02708e), 2021-01-01

### Raw images of Western blot

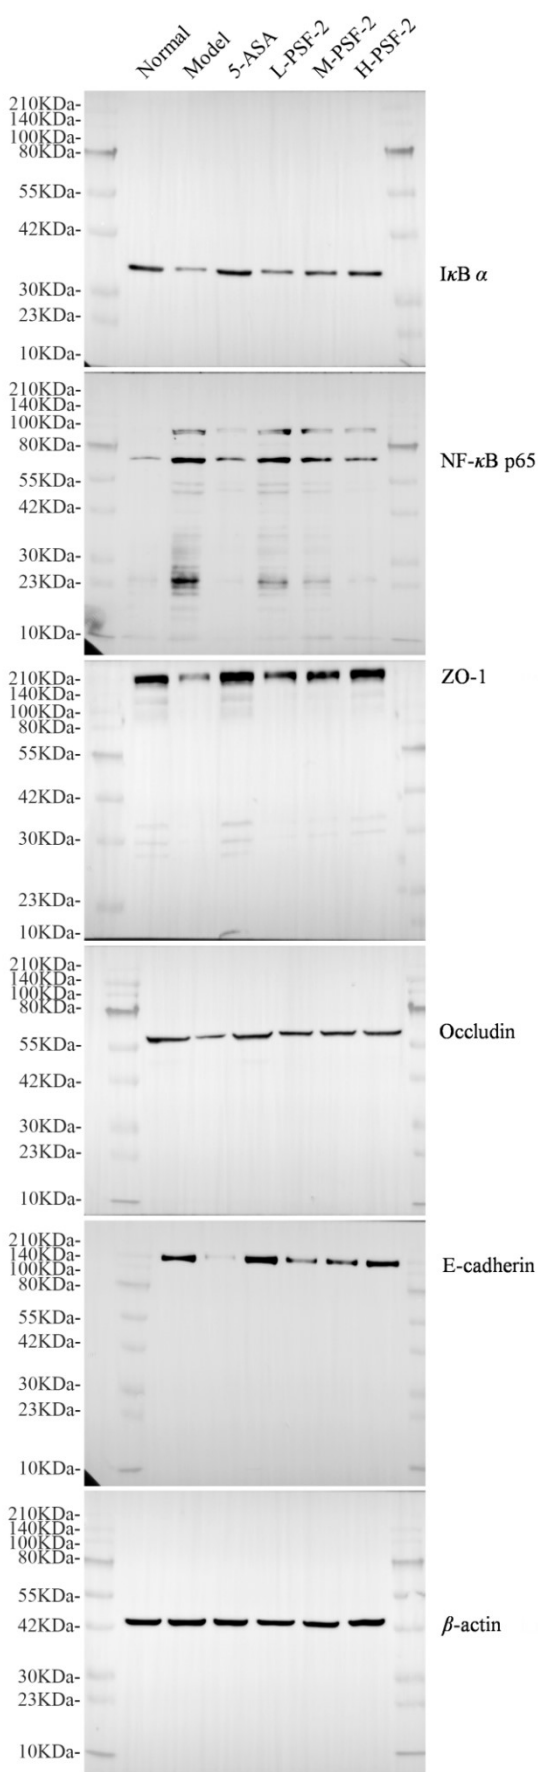

Supplement: d1fo02708e1.pdf [file d1fo02708e1.pdf]
